# Supplementary material for: Actinobacteria associated with stingless bees biosynthesize bioactive polyketides against bacterial pathogens
Source: Royal Society of Chemistry journal article supplement (doi:10.1039/c9nj01619h), 2019-01-01
Supplement: c9nj01619h1.pdf [file c9nj01619h1.pdf]

## SUPPLEMENTARY MATERIAL

### Actinobacteria associated with stingless bee biosynthesize bioactive polyketides against bacterial pathogen

Diego Rodríguez-Hernández<sup>a</sup>, Weilan G. P. Melo<sup>a</sup>, Carla Menegatti<sup>a</sup>, Vitor B. Lourenzon<sup>a</sup>, Fábio S. do Nascimento<sup>b</sup>, Mônica T. Pupo<sup>\*a</sup>.

<sup>a</sup>Departamento de Ciências Farmacêuticas, Faculdade de Ciências Farmacêuticas de Ribeirão Preto, Universidade de São Paulo, 14040-903 Ribeirão Preto, SP, Brazil

<sup>b</sup>Departamento de Biologia, Faculdade de Filosofia, Ciências e Letras de Ribeirão Preto, Universidade de São Paulo, 14040-901 Ribeirão Preto, SP, Brazil.

\*Corresponding author. E-mail address: mtpupo@fcrfp.usp.br (Mônica T. Pupo)

| Table of contents                                                                                                                                                                                                                                                                                                                                                                                                                                                                                            | Page |
|--------------------------------------------------------------------------------------------------------------------------------------------------------------------------------------------------------------------------------------------------------------------------------------------------------------------------------------------------------------------------------------------------------------------------------------------------------------------------------------------------------------|------|
| <b>Table S1.</b> 16S rRNA identification of actinobacteria isolated from <i>Mellipona scutellaris</i> colony.                                                                                                                                                                                                                                                                                                                                                                                                | 2    |
| <b>Fig. S1.</b> Macroscopic characteristics of actinobacterial strains isolated from <i>M. scutellaris</i> , cultured in ISP-2 agar during 10 days at 30 °C ( <i>Streptomyces</i> sp. ICBG1307, <i>Streptomyces</i> sp. ICBG1313, <i>Streptomyces</i> sp. ICBG1318, <i>Streptomyces</i> sp. ICBG1319, <i>Streptomyces</i> sp. ICBG1323, <i>Streptomyces</i> sp. ICBG1324, and <i>Micromonospora</i> sp. ICBG1321).                                                                                           | 2    |
| <b>Table S2.</b> Visual depiction of antagonist assay between isolated actinobacteria against <i>P. larvae</i> ATCC 9545, <i>M. anisopliae</i> and <i>B. bassiana</i> .                                                                                                                                                                                                                                                                                                                                      | 3    |
| <b>Table S3.</b> <sup>1</sup> H (500 MHz) and <sup>13</sup> C (125 MHz) NMR data for compound <b>8</b> (CD <sub>3</sub> OD).                                                                                                                                                                                                                                                                                                                                                                                 | 4    |
| <b>Table S4.</b> <sup>1</sup> H (500 MHz) and <sup>13</sup> C (125 MHz) NMR data for compound <b>13</b> and their isomer reported by Kunnari et al. (1999) (CDCl <sub>3</sub> ).                                                                                                                                                                                                                                                                                                                             | 5    |
| <b>Fig. S2.</b> NOESY correlations. A) compounds <b>7</b> ; B) compound <b>8</b> .                                                                                                                                                                                                                                                                                                                                                                                                                           | 6    |
| <b>Fig. S3.</b> gHMBC correlations of compounds <b>7</b> , <b>9</b> and <b>13</b> .                                                                                                                                                                                                                                                                                                                                                                                                                          | 6    |
| <b>Fig. S4.</b> Dose-response curve using the isolated compounds ( <b>1-15</b> ) against <i>P. larvae</i> ATCC 9545. A) Lobophorins ( <b>1-4</b> ); B) Quinocyclines ( <b>5-8</b> and <b>14-15</b> ) and C) Anthracyclines ( <b>9-13</b> ). The dose-response curves log (Concentration of compounds <b>1-15</b> ) versus OD <sub>600</sub> values of <i>P. larvae</i> ATCC 9545 were obtained using GraphPad Prism 5.0 software, through of nonlinear regression analysis and were performed in triplicate. | 7    |
| <b>Fig. S5.</b> <sup>1</sup> H NMR spectrum of <b>13</b> (500 MHz, CDCl <sub>3</sub> ).                                                                                                                                                                                                                                                                                                                                                                                                                      | 8    |
| <b>Fig. S6.</b> gHSQC spectrum of <b>13</b> in CDCl <sub>3</sub> .                                                                                                                                                                                                                                                                                                                                                                                                                                           | 8    |
| <b>Fig. S7.</b> gCOSY spectrum of <b>13</b> in CDCl <sub>3</sub> .                                                                                                                                                                                                                                                                                                                                                                                                                                           | 9    |
| <b>Fig. S8.</b> gHMBC spectrum of <b>13</b> in CDCl <sub>3</sub> .                                                                                                                                                                                                                                                                                                                                                                                                                                           | 9    |
| <b>Fig. S9.</b> The HRESIMS spectrum of <b>13</b> , (mode negative).                                                                                                                                                                                                                                                                                                                                                                                                                                         | 10   |
| <b>Notes and references</b>                                                                                                                                                                                                                                                                                                                                                                                                                                                                                  | 10   |

**Table S1.** 16S rRNA identification of actinobacteria isolated from *Mellipona scutellaris* colony.

| Isolates                             | Isolation source                          | NCBI accession number | Closest relative (accession number)                    |
|--------------------------------------|-------------------------------------------|-----------------------|--------------------------------------------------------|
| ICBG1307 - <i>Streptomyces</i> sp.   | <i>Mellipona scutellaris</i><br>nurse bee | MK608316              | <i>Streptomyces kunmingensis</i><br>(AB184597)         |
| ICBG1313 - <i>Streptomyces</i> sp.   | <i>M. scutellaris</i><br>nurse bee        | MK608317              | <i>Streptomyces drozdowiczii</i><br>(AB249957)         |
| ICBG1318 - <i>Streptomyces</i> sp.   | <i>M. scutellaris</i><br>nurse bee        | MK608318              | <i>Streptomyces albiacialis</i><br>(AY999901)          |
| ICBG1319 - <i>Streptomyces</i> sp.   | <i>M. scutellaris</i><br>nurse bee        | MK608319              | <i>Streptomyces xylanilyticus</i><br>(LC128341)        |
| ICBG1321 - <i>Micromonospora</i> sp. | <i>M. scutellaris</i><br>nurse bee        | MK608320              | <i>Micromonospora tulbaghia</i><br>(Jgi.1058868)       |
| ICBG1323 - <i>Streptomyces</i> sp.   | <i>M. scutellaris</i><br>foraging bee     | MK608321              | <i>Streptomyces olivaceus</i><br>(JOFH01000101)        |
| ICBG1324 - <i>Streptomyces</i> sp.   | <i>M. scutellaris</i><br>foraging bee     | MK608322              | <i>Streptomyces rhizosphaerihabitans</i><br>(HQ267983) |

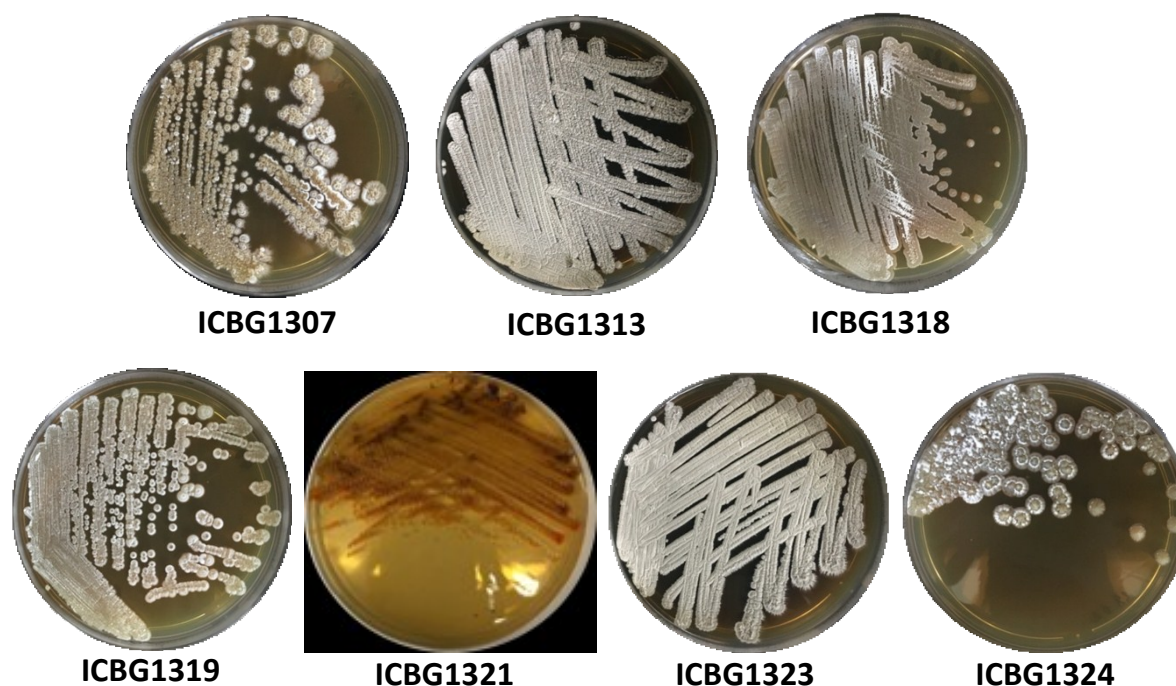

**Fig. S1** Macroscopic characteristics of actinobacterial strains isolated from *M. scutellaris*, cultured in ISP-2 agar during 10 days at 30 °C (*Streptomyces* sp. ICBG1307, *Streptomyces* sp. ICBG1313, *Streptomyces* sp. ICBG1318, *Streptomyces* sp. ICBG1319, *Streptomyces* sp. ICBG1323, *Streptomyces* sp. ICBG1324, and *Micromonospora* sp. ICBG1321).

**Table S2.** Visual depiction of antagonist assay between isolated actinobacteria against *P. larvae* ATCC 9545, *M. anisopliae* and *B. bassiana*.

| Strains                            | <i>P. larvae</i> | <i>M. anisopliae</i> | <i>B. bassiana</i> | Inhibition |
|------------------------------------|------------------|----------------------|--------------------|------------|
| <i>Streptomyces</i> sp. ICBG1307   | 0                | 0                    | 0                  | 0          |
| <i>Streptomyces</i> sp. ICBG1313   | 0                | 0                    | 0                  | 3          |
| <i>Streptomyces</i> sp. ICBG1319   | 0                | 0                    | 0                  | 2          |
| <i>Streptomyces</i> sp. ICBG1324   | 0                | 0                    | 0                  | 1          |
| <i>Streptomyces</i> sp. ICBG1318   | 3                | 0                    | 0                  | 0          |
| <i>Streptomyces</i> sp. ICBG1323   | 3                | 0                    | 0                  | 0          |
| <i>Micromonospora</i> sp. ICBG1321 | 3                | 0                    | 0                  | 0          |

**High**



**Low**

**Table S3.**  $^1\text{H}$  (500 MHz) and  $^{13}\text{C}$  (125 MHz) NMR data for compound **8** ( $\text{CD}_3\text{OD}$ ).

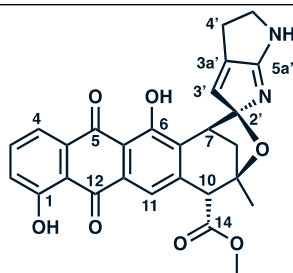

| Compound 8 |                         |                                |
|------------|-------------------------|--------------------------------|
| #          | $^{13}\text{C}$ NMR     | $^1\text{H}$ NMR (m, $J$ = Hz) |
| 1          | 163.8 (C)               | -                              |
| 2          | 125.8 (CH)              | 7.34 (d, 8.1)                  |
| 3          | 137.9 (CH)              | 7.76 (dd, 7.5; 8.1)            |
| 4          | 120.12 (CH)             | 7.82 (d, 7.4)                  |
| 4a         | 134.67 (C)              | -                              |
| 5          | 188.8 (C)               | -                              |
| 5a         | 115.1 (C)               | -                              |
| 6          | 159.8 (C)               | -                              |
| 6a         | 134.14 (C)              | -                              |
| 7          | 44.18 (CH)              | 4.25 (d, 4.0)                  |
| 8A         | 36.01 ( $\text{CH}_2$ ) | 2.76 (d, 12.7)                 |
| 8B         |                         | 2.47 (dd, 12.7; 4.0)           |
| 9          | 85.1 (C)                | -                              |
| 10         | 58.14 (CH)              | 4.07 (s)                       |
| 10a        | 142.9 (C)               | -                              |
| 11         | 120.03 (CH)             | 7.66 (s)                       |
| 11a        | 134.67 (C)              |                                |
| 12         | 188.27 (C)              | -                              |
| 12a        | 116.7 (C)               | -                              |
| 13         | 23.63 ( $\text{CH}_3$ ) | 1.58 (s)                       |
| 14         | 172.1 (C)               | -                              |
| 15         | 53.05 ( $\text{CH}_3$ ) | 3.82 (s)                       |
| 2'         | 116.8 (C)               | -                              |
| 3'         | 134.8                   | 5.72 (t, 2.1)                  |
| 3a'        | 141.4 (C)               | -                              |
| 4'         | 21.67 ( $\text{CH}_2$ ) | 2.85 (m)                       |
| 5'         | 54.16 ( $\text{CH}_2$ ) | 4.17 (m)                       |
| 5a'        | 168.8 (C)               | -                              |

**Table S4.**  $^1\text{H}$  (500 MHz) and  $^{13}\text{C}$  (125 MHz) NMR data for compound **13** and their isomer reported by KUNNARI et al. (1999) ( $\text{CDCl}_3$ ).

| 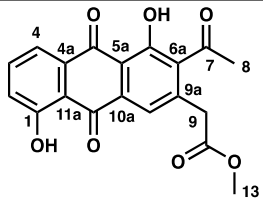 |                          |  |                        |                              |
|-----------------------------------------------------------------------------------|--------------------------|------------------------------------------------------------------------------------|------------------------|------------------------------|
| Compound <b>13</b>                                                                |                          | Kunnari et al., 1999                                                               |                        |                              |
| #                                                                                 | $^{13}\text{C}$ NMR      | $^1\text{H}$ NMR (m, J = Hz)                                                       | $^{13}\text{C}$ NMR    | $^1\text{H}$ NMR (m, J = Hz) |
| <b>1</b>                                                                          | 162.8 (C)                | -                                                                                  | 119.8 (CH)             | 7.85 (dd, 7.4; 1.2)          |
| <b>1-OH</b>                                                                       | -                        | 11.93 (s)                                                                          | -                      | -                            |
| <b>2</b>                                                                          | 124.7 (CH)               | 7.34 (d, 8.4)                                                                      | 132.7 (CH)             | 7.73 (dd, 8.5; 7.4)          |
| <b>3</b>                                                                          | 137.4 (CH)               | 7.73 (dd, 8.4; 7.5)                                                                | 124.6 (CH)             | 7.34 (dd, 8.5; 1.2)          |
| <b>4</b>                                                                          | 120.2 (CH)               | 7.85 (d, 7.5)                                                                      | 162.1 (C)              | -                            |
| <b>4-OH</b>                                                                       | -                        | -                                                                                  | -                      | 11.94 (s)                    |
| <b>4a</b>                                                                         | 133.3 (C)                | -                                                                                  | 114.8 (C)              | -                            |
| <b>5</b>                                                                          | 180.9 (C)                | -                                                                                  | 180.4 (C)              | -                            |
| <b>5a</b>                                                                         | 115.6 (C)                | -                                                                                  | 115.1 (C)              | -                            |
| <b>6</b>                                                                          | 160.1 (C)                | -                                                                                  | 159.5 (C)              | -                            |
| <b>6-OH</b>                                                                       | -                        | 12.53 (s)                                                                          | -                      | 12.54 (s)                    |
| <b>6a</b>                                                                         | 135.9 (C)                | -                                                                                  | 135.5 (C)              | -                            |
| <b>7</b>                                                                          | 202.8 (C)                | -                                                                                  | 202.2 (C)              | -                            |
| <b>8</b>                                                                          | 31.5 ( $\text{CH}_3$ )   | 2.68 (s)                                                                           | 31.2 ( $\text{CH}_3$ ) | 2.96 (s)                     |
| <b>9</b>                                                                          | 38.4 5 ( $\text{CH}_2$ ) | 3.87 (s)                                                                           | 38.3 ( $\text{CH}_2$ ) | 3.88 (s)                     |
| <b>9a</b>                                                                         | 142.5 (C)                | -                                                                                  | 141.1 (C)              | -                            |
| <b>10</b>                                                                         | 122.3 (CH)               | 7.70 (s)                                                                           | 121.9 (CH)             | 7.71 (s)                     |
| <b>10a</b>                                                                        | Not observed             | -                                                                                  | 132.7 (C)              | -                            |
| <b>11</b>                                                                         | 181.2 (C)                | -                                                                                  | 192.1 (C)              | -                            |
| <b>11a</b>                                                                        | 116.0 (C)                | -                                                                                  | 133.0 (C)              | -                            |
| <b>12</b>                                                                         | 170.9 (C)                | -                                                                                  | 169.7 (C)              | -                            |
| <b>13</b>                                                                         | 52.7 ( $\text{CH}_3$ )   | 3.71 (s)                                                                           | 51.9 ( $\text{CH}_3$ ) | 3.72 (s)                     |

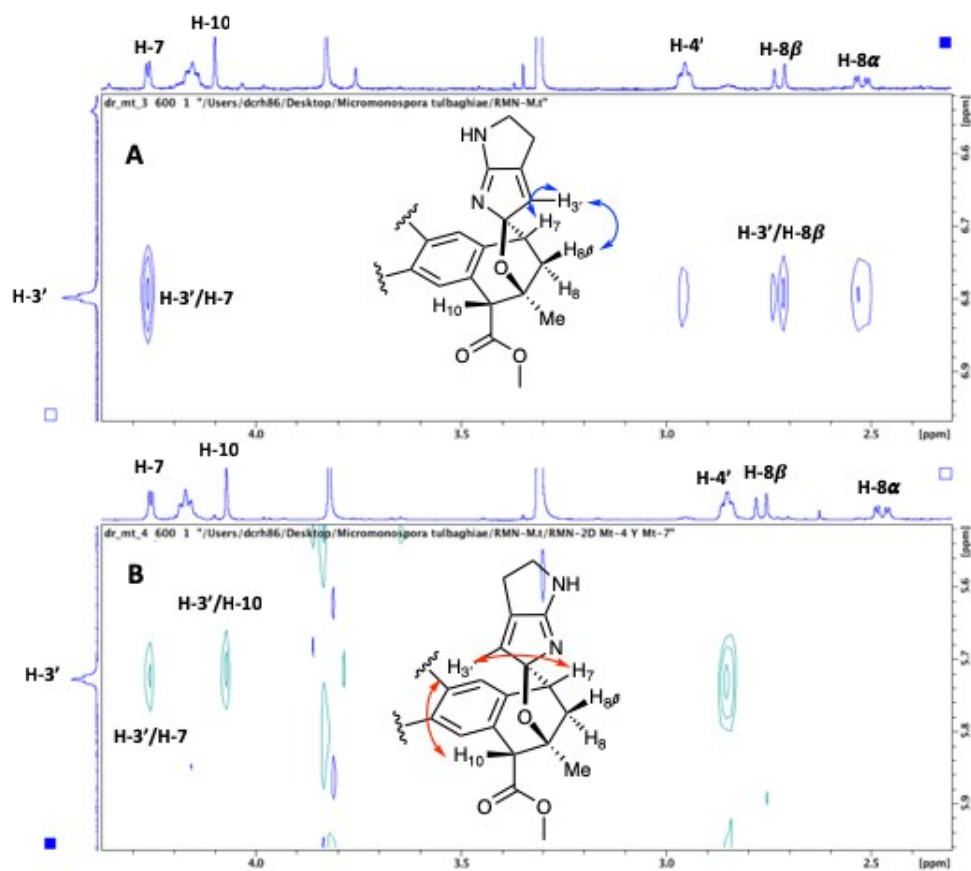

Fig. S2. NOESY correlations. A) compounds **7**; B) compound **8**.

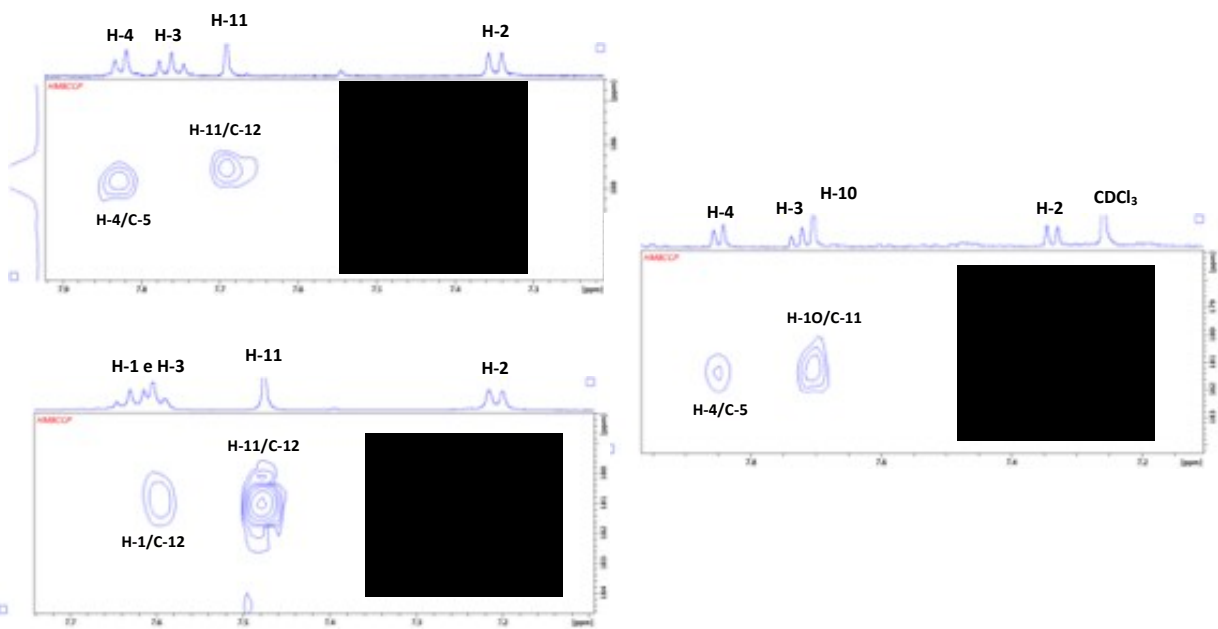

Fig. S3. gHMBC correlations of compounds **7**, **9** and **13**.

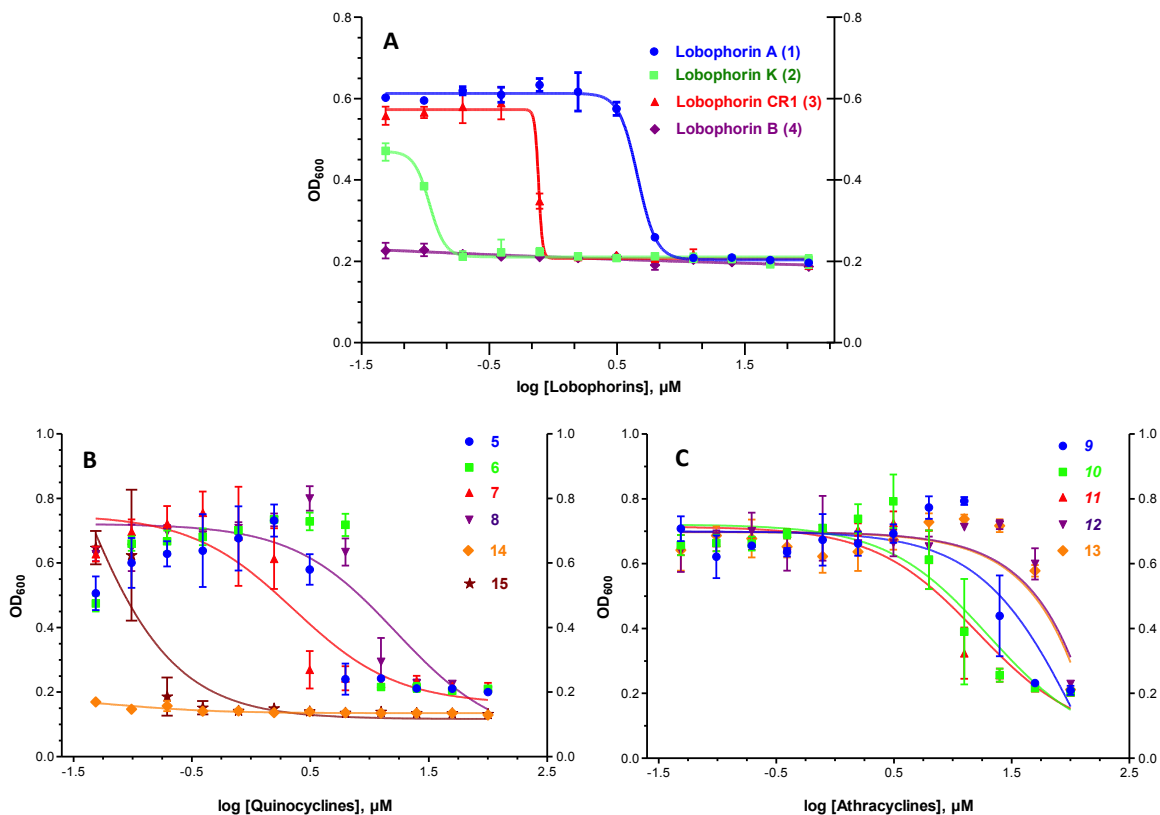

**Figure S4.** Dose-response curve using the isolated compounds (**1-15**) against *P. larvae* ATCC 9545. A) Lobophorins (**1-4**); B) Quinocyclines (**5-8** and **14-15**) and C) Anthracyclines (**9-13**). The dose-response curves log (Concentration of compounds **1-15**) versus OD<sub>600</sub> values of *P. larvae* ATCC 9545 were obtained using GraphPad Prism 5.0 software, through of nonlinear regression analysis and were performed in triplicate.

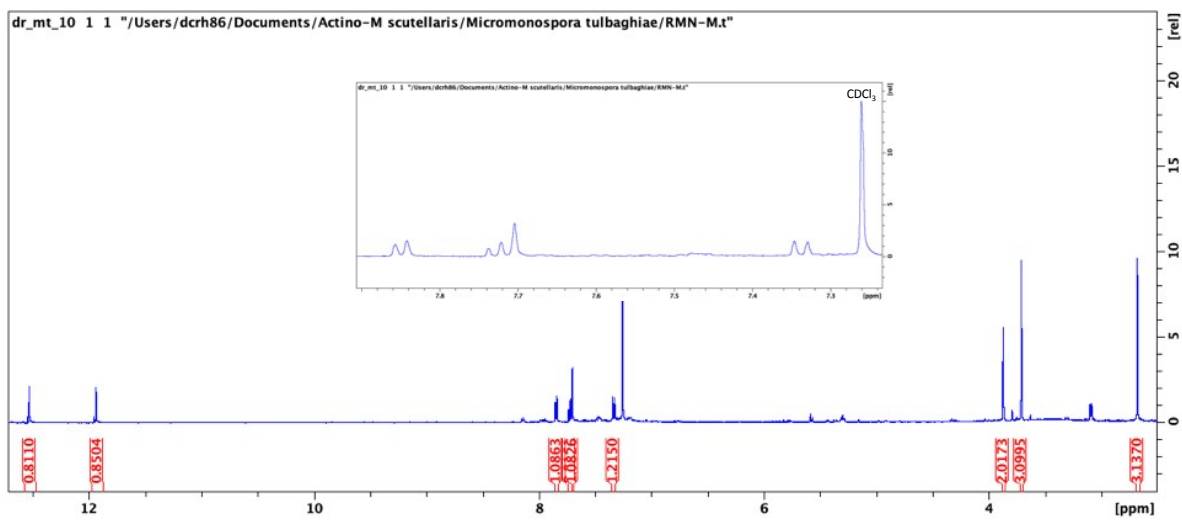

Fig. S5. <sup>1</sup>H NMR spectrum of **13** (500 MHz, CDCl<sub>3</sub>).

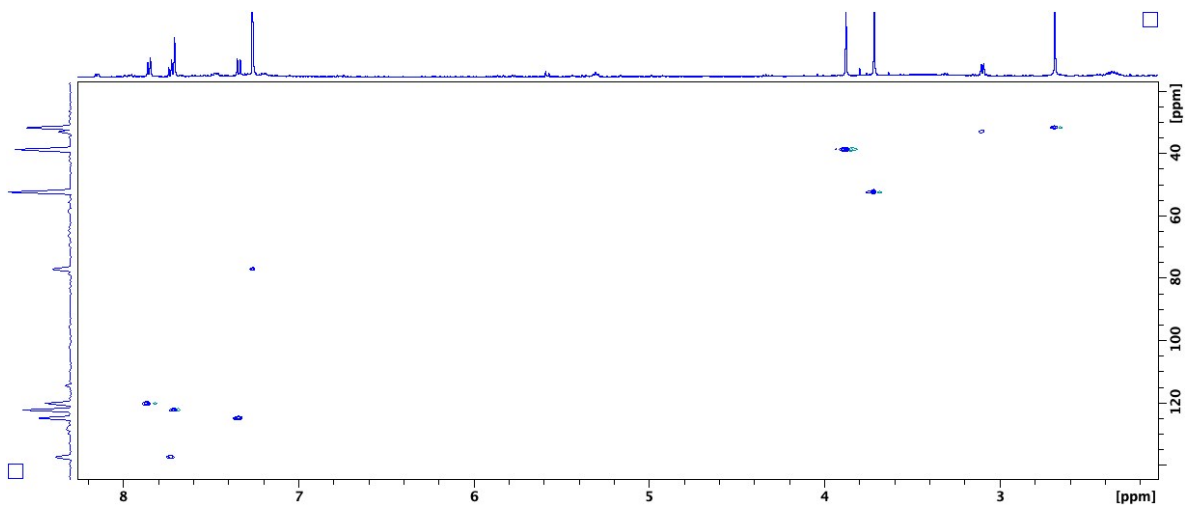

Fig. S6. gHSQC spectrum of **13** in CDCl<sub>3</sub>.



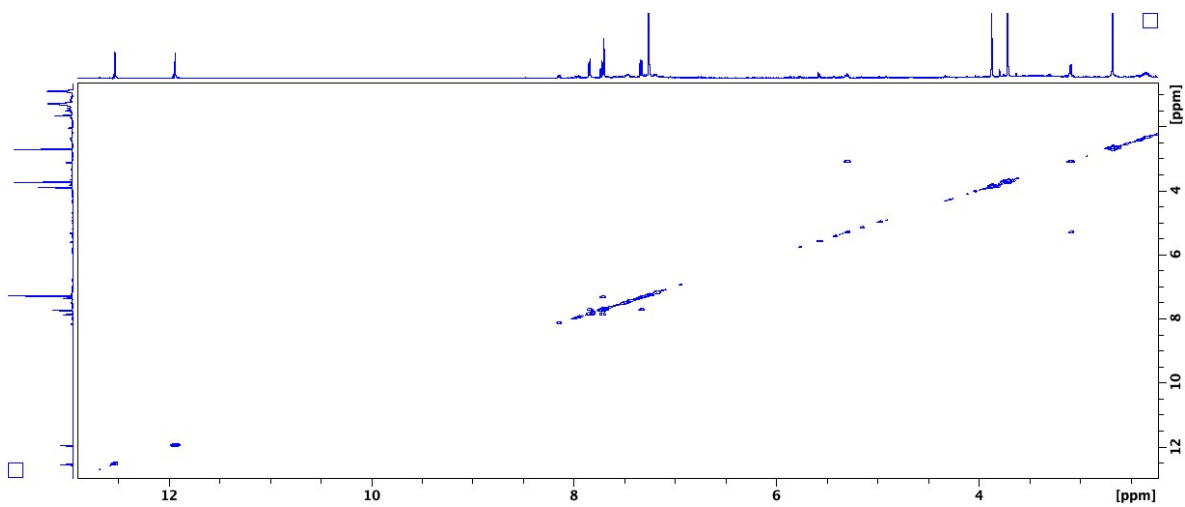

**Fig. S7.** *g*COSY spectrum of **13** in CDCl<sub>3</sub>.

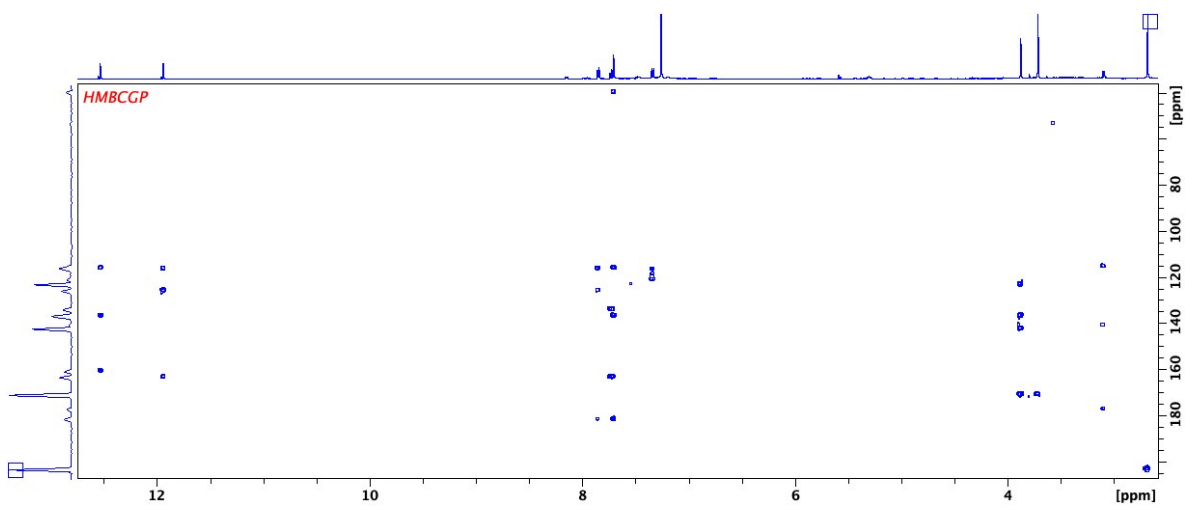

**Fig. S8.** *g*HMBC spectrum of **13** in CDCl<sub>3</sub>.

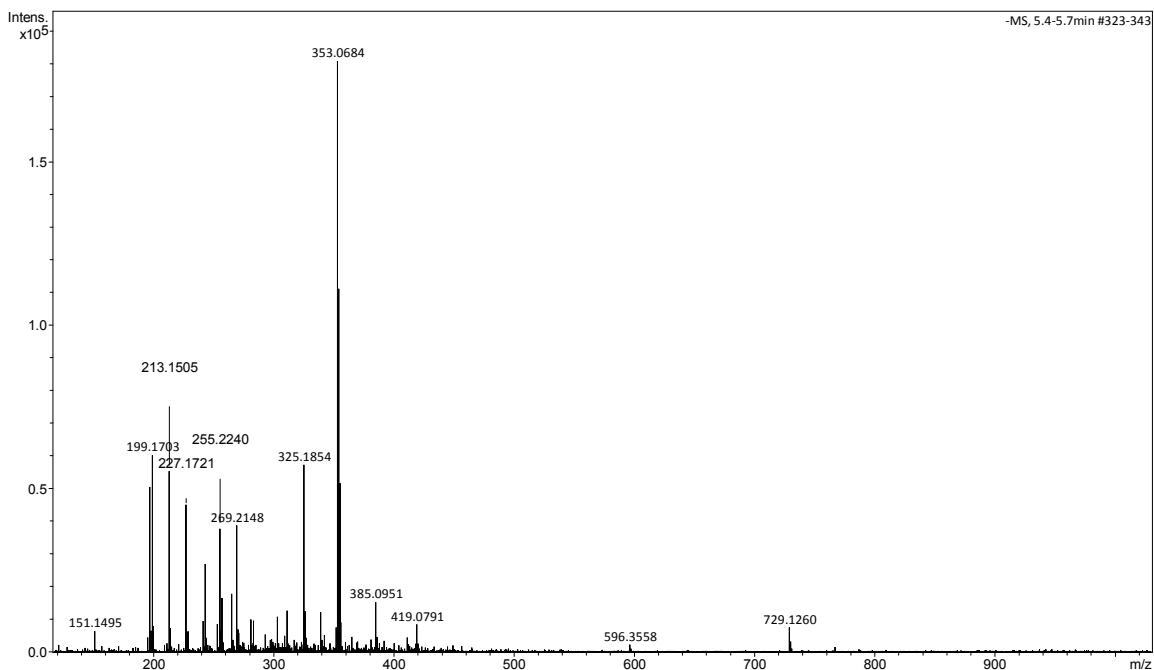

**Fig. S9.** The HRESIMS [M-H]<sup>-</sup> spectrum of **13**,  $m/z$  (experimental mass) = 353.0684 ([M-H]<sup>-</sup>),  $m/z$  (calculated mass [calcd.]) = 353.0667 ([M-H]<sup>-</sup>) consistent with the molecular formula C<sub>19</sub>H<sub>14</sub>O<sub>7</sub>.

### Notes and references

T. Kunnari, J. Kantola, K. Ylihonko, K. D. Klika, P. Mäntsälä, J. Hakala, J. Chem. Soc. Perkin. Trans., 1999, 2, 1649-1652.
